# Supplementary material
Source: PubMed Central journal article supplement (PMC3386056)
Supplement: 1200062109_pnas.201200062SI.pdf [file 1200062109_pnas.201200062SI.pdf]

# Supporting Information

Wu et al. 10.1073/pnas.1200062109

## SI Materials and Methods

**Chemicals and Standards.** All-*trans*-retinoic acid (atRA), 13-*cis*-RA (13cRA), 9-*cis*-RA (9cRA), and acitretin were purchased from Sigma. All-*trans*-4-oxo-RA (at-4-oxo-RA), 13-*cis*-4-oxo-RA (13c-4-oxo-RA), 9-*cis*-4-oxo-RA (9c-4-oxo-RA), and atRA-*d*<sub>5</sub> were obtained from Toronto Research Chemicals.

Methanol, acetonitrile, ethyl acetate, hexane, methylene chloride, and chloroform were HPLC grade and purchased from Fisher Chemical. HPLC-grade formic acid and acetic acid were provided by Dima Technology. Ultrapure water was obtained by a Milli-Q Synthesis water purification system (Millipore) under a conductivity of 18.2  $\Omega\text{-cm}^{-1}$ .

**Study Area.** Taihu Lake (119°54'–120°36' N, 30°56'–31°33' E), the third-largest freshwater lake in China (surface area: 2,338 km<sup>2</sup>, maximum depth: 2.6 m, average depth: 1.9 m, mean water residence time: 264 d), is located in the highly developed and densely populated Yangtze Delta and serves as an important source of water for irrigation, aquaculture, and industrial waters as well as the primary drinking water source for 30 million residents in the lake basin and Shanghai. Since the 1980s, eutrophication as a consequence of human activities has become an increasingly serious issue in Taihu Lake, and annual lake-wide cyanobacteria blooms have occurred during warm seasons every year.

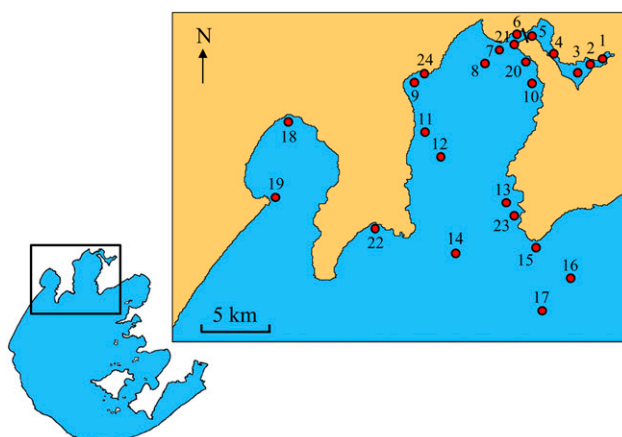

Fig. S1. Sampling sites in Taihu Lake, China.

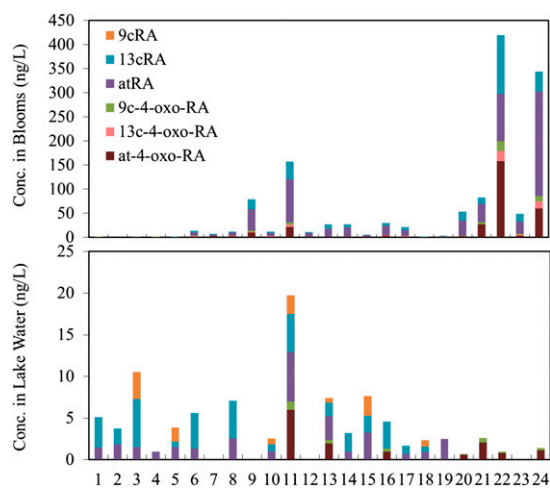

Fig. S2. Concentrations of RAs and 4-oxo-RAs in bloom samples (Upper) and water samples (Lower) collected from Taihu Lake, China. The x axis represents the sampling sites.





**Table S1. Information on the cyanobacteria and algae surveyed**

| Phylum                   | Genus                 | Species                   | Strain no.             | Origin                    |                     |
|--------------------------|-----------------------|---------------------------|------------------------|---------------------------|---------------------|
| Cyanophyta               | <i>Merismopedia</i>   | <i>Merismopedia</i> sp.   | FACHB-286              | United States             |                     |
|                          | <i>Synechocystis</i>  | <i>Synechocystis</i> sp.  | FACHB-898              | France                    |                     |
|                          | <i>Microcystis</i>    | <i>Microcystis</i> sp.    | FACHB-1009             | Dianchi Lake (China)      |                     |
|                          |                       | <i>M. flos-aquae</i>      | FACHB-1028             | Taihu Lake (China)        |                     |
|                          |                       | <i>M. aeruginosa</i>      | FACHB-905              | Dianchi Lake              |                     |
|                          |                       | <i>M. aeruginosa</i>      | FACHB-912              | Taihu Lake                |                     |
|                          |                       | <i>M. wesenbergii</i>     | FACHB-908              | Dianchi Lake              |                     |
|                          |                       | <i>M. viridis</i>         | FACHB-1284             | Dianchi Lake              |                     |
|                          |                       | <i>M. ichthyoblabe</i>    | FACHB-1294             | Taihu Lake                |                     |
|                          |                       | <i>Chroococcus</i>        | <i>Chroococcus</i> sp. | FACHB-193                 | Donghu Lake (China) |
|                          | <i>Nostoc</i>         | <i>Nostoc</i> sp.         | FACHB-1042             | China                     |                     |
|                          |                       | <i>Nostoc</i> sp.         | FACHB-1043             | China                     |                     |
|                          | <i>Anabaena</i>       | <i>A. cylindrica</i>      | FACHB-1038             | Dianchi Lake              |                     |
|                          |                       | <i>Anabaena</i> sp.       | FACHB-1088             | Nanhu Lake (China)        |                     |
|                          |                       | <i>A. flos-aquae</i>      | FACHB-1092             | Dianchi Lake              |                     |
|                          | <i>Pseudanabaena</i>  | <i>Pseudanabaena</i> sp.  | FACHB-1277             | Xionghu Reservoir (China) |                     |
|                          | <i>Oscillatoria</i>   | <i>O. tenuis</i>          | FACHB-247              | United States             |                     |
|                          |                       | <i>O. planctonica</i>     | FACHB-708              | Donghu Lake               |                     |
|                          |                       | <i>O. raciborskii</i>     | FACHB-881              | Dianchi Lake              |                     |
|                          |                       | <i>Phormidium</i>         | <i>P. mucicola</i>     | FACHB-723                 | China               |
|                          | <i>Phormidium</i>     | <i>Phormidium</i> sp.     | FACHB-1099             | Dianchi Lake              |                     |
|                          |                       | <i>Aphanizomenon</i>      | <i>Ap. flos-aquae</i>  | FACHB-1039                | Dianchi Lake        |
|                          |                       |                           | <i>Ap. flos-aquae</i>  | FACHB-1171                | Taihu Lake          |
| <i>Ap. issatschenkoi</i> | FACHB-1247            |                           | Donghu Lake            |                           |                     |
| Chlorophyta              | <i>Chlamydomonas</i>  | <i>Chlamydomonas</i> sp.  | FACHB-715              | Donghu Lake               |                     |
|                          | <i>Chlorella</i>      | <i>Chlorella</i> sp.      | FACHB-1067             | China                     |                     |
|                          | <i>Pediastrum</i>     | <i>Pediastrum</i> sp.     | FACHB-704              | China                     |                     |
|                          | <i>Scenedesmus</i>    | <i>Scenedesmus</i> sp.    | FACHB-933              | Dianchi Lake              |                     |
|                          | <i>Selenastrum</i>    | <i>S. capricornutum</i>   | FACHB-271              | United States             |                     |
|                          | <i>Ankistrodesmus</i> | <i>Ankistrodesmus</i> sp. | FACHB-1044             | Dianchi Lake              |                     |
|                          | <i>Oedogonium</i>     | <i>Oedogonium</i> sp.     | FACHB-686              | China                     |                     |
|                          | <i>Staurastrum</i>    | <i>Staurastrum</i> sp.    | FACHB-719              | Taiping Lake (China)      |                     |
| Bacillariophyta          | <i>Cyclotella</i>     | <i>C. hebeiiana</i>       | FACHB-1030             | Guanqiao Pond (China)     |                     |
|                          | <i>Nitzschia</i>      | <i>Nitzschia</i> sp.      | FACHB-510              | China                     |                     |
|                          | <i>Navicula</i>       | <i>Navicula</i> sp.       | FACHB-1054             | Taihu Lake                |                     |
|                          | <i>Melosira</i>       | <i>M. varians</i>         | FACHB-1034             | Guangzhou (China)         |                     |
|                          | <i>Synedra</i>        | <i>Synedra</i> sp.        | FACHB-1131             | Donghu Lake               |                     |
|                          | <i>Cymbella</i>       | <i>Cymbella</i> sp.       | FACHB-844              | China                     |                     |
| Euglenophyta             | <i>Euglena</i>        | <i>E. gracilis</i>        | FACHB-848              | Japan                     |                     |

FACHB, Freshwater Algae Culture Collection of the Institute of Hydrobiology, Chinese Academy of Sciences.

**Table S2. Recoveries and limits of quantification (LOQs) for RAs and 4-oxo-RAs in different matrices**

| Parameter           | Sample         | Matrix        | at-4-oxo-RA | 13c-4-oxo-RA | 9c-4-oxo-RA | atRA   | 13cRA  | 9cRA   |
|---------------------|----------------|---------------|-------------|--------------|-------------|--------|--------|--------|
| Percentage recovery | Natural blooms | Intracellular | 62 ± 5      | 53 ± 9       | 54 ± 3      | 61 ± 4 | 66 ± 7 | 54 ± 8 |
|                     |                | Extracellular | 55 ± 6      | 60 ± 7       | 59 ± 7      | 51 ± 9 | 56 ± 8 | 59 ± 4 |
|                     | Cultured algae | Intracellular | 70 ± 1      | 61 ± 7       | 69 ± 3      | 56 ± 9 | 61 ± 7 | 50 ± 3 |
|                     |                | Extracellular | 76 ± 3      | 68 ± 2       | 59 ± 8      | 58 ± 5 | 52 ± 6 | 63 ± 2 |
| LOQ                 | Natural blooms | Intracellular | 0.1         | 0.1          | 0.1         | 0.3    | 0.3    | 0.8    |
|                     |                | Extracellular | 0.06        | 0.1          | 0.1         | 0.2    | 0.2    | 0.4    |
|                     | Cultured algae | Intracellular | 0.5         | 1.0          | 1.0         | 3.0    | 4.0    | 6.0    |
|                     |                | Extracellular | 3.0         | 4.0          | 10          | 8.0    | 8.0    | 20     |

LOQ concentrations are expressed in ng/L except for intracellular cultured algae, which is expressed in ng/g DW.
